# Supplementary material for: Pb3SBrI3: the first Pb-based chalcohalide with multiple halogens features a unique two-dimensional structure composed of diverse Pb-centered polyhedra
Source: Royal Society of Chemistry journal article supplement (doi:10.1039/d2dt02038f), 2022-01-01
Supplement: d2dt02038f1.pdf [file d2dt02038f1.pdf]

## ***SUPPORTING INFORMATION***

### **Pb<sub>3</sub>SBrI<sub>3</sub>: The first Pb-based chalcogenide with multiple halogens features unique two-dimensional structure composed by diverse Pb-centered polyhedra**

Mei Yan, Ru-Ling Tang, \* Wenfeng Zhou, Wenlong Liu, and Sheng-Ping Guo\*

*School of Chemistry and Chemical Engineering, Yangzhou University, Yangzhou, Jiangsu 225002, P. R. China*

*Corresponding authors: rltang@yzu.edu.cn, spguo@yzu.edu.cn*

### **Contents**

#### **Tables and Figures**

Table S1. Atomic coordinates ( $\times 10^4$ ) and equivalent isotropic displacement parameters ( $U_{eq}$ ,  $\text{\AA}^2 \times 10^3$ ) for Pb<sub>3</sub>SBrI<sub>3</sub>.

Table S2. Important bond lengths ( $\text{\AA}$ ) and bond angles ( $^\circ$ ) for Pb<sub>3</sub>SBrI<sub>3</sub>.

Table S3. Pb-based chalcogenides.

Table S4. Chalcogenides with multiple halogens.

Figure S1. Unique stepped layers shape formed by adjacent parallelograms extending along the *b*-axis.

Figure S2. Two seesaw-like [Pb<sub>4</sub>S<sub>3</sub>I]<sup>+</sup> units in the [Pb<sub>3</sub>I<sub>4</sub>S<sub>2</sub>]<sub>∞</sub> neutral layer.

Figure S3. The TG-DSC curves of Pb<sub>3</sub>SBrI<sub>3</sub>.

Figure S4. Simulated and experimental XRD patterns of powder sample of Pb<sub>3</sub>SBrI<sub>3</sub> after heated at 400 °C.

**Table S1. Atomic coordinates ( $\times 10^4$ ) and equivalent isotropic displacement parameters ( $U_{\text{eq}}, \text{\AA}^2 \times 10^3$ ) for  $\text{Pb}_3\text{SBrI}_3$ .**

| atom  | Wyckoff site | $x$        | $y$   | $z$        | $U_{\text{eq}}/\text{\AA}^2$ |
|-------|--------------|------------|-------|------------|------------------------------|
| Pb(1) | $2e$         | 3000.9(9)  | 7500  | 9323.6(7)  | 28.6(3)                      |
| Pb(2) | $2e$         | 7045.6(10) | 7500  | 7828.8(6)  | 30.3(3)                      |
| Pb(3) | $2e$         | 2495.1(11) | 2500  | 5444.9(7)  | 32.9(3)                      |
| I(1)  | $2e$         | 9476.5(16) | 2500  | 8671.4(12) | 29.3(4)                      |
| I(2)  | $2e$         | -421.9(17) | 2500  | 3725.1(12) | 31.0(4)                      |
| I(3)  | $2e$         | 4058.2(17) | 2500  | 7685.0(11) | 31.5(4)                      |
| Br(1) | $2e$         | 3478(2)    | -2500 | 4209.3(16) | 24.0(5)                      |
| S(1)  | $2e$         | 6280(6)    | 7500  | 9535(4)    | 18.7(10)                     |

<sup>a</sup> $U_{\text{eq}}$  is defined as one third of the trace of the orthogonalized  $U_{ij}$  tensor.

**Table S2. Important bond lengths (Å) and bond angles (°) for Pb<sub>3</sub>SBrI<sub>3</sub>.**

| Bond          | Dist./Å   | Bond                 | Angle/Å   |
|---------------|-----------|----------------------|-----------|
| Pb(1)–S(1)    | 2.753(5)  | S(1)–Pb(1)–S(1)#1    | 79.48(11) |
| Pb(1)–S(1)#1  | 2.799(3)  | I(1)#3–Pb(2)–I(1)    | 90.74(5)  |
| Pb(1)–S(1)#2  | 2.799(3)  | I(1)#3–Pb(2)–I(3)    | 159.28(5) |
| Pb(1)–I(1)    | 3.158(13) | I(1)–Pb(2)–I(3)      | 89.23(3)  |
| Pb(2)–I(1)#3  | 3.158(13) | I(3)–Pb(2)–I(3)#3    | 83.60(4)  |
| Pb(2)–I(3)    | 3.372(13) | S(1)–Pb(2)–I(1)      | 83.41(8)  |
| Pb(2)–I(3)#3  | 3.372(13) | S(1)–Pb(2)–I(3)      | 76.00(8)  |
| Pb(2)–S(1)    | 2.668(5)  | I(2)–Pb(3)–I(2)#4    | 83.76(4)  |
| Pb(3)–I(2)#4  | 3.213(13) | I(2)–Pb(3)–I(3)      | 153.79(5) |
| Pb(3)–I(2)#5  | 3.213(13) | I(2)#5–Pb(3)–I(3)    | 77.62(4)  |
| Pb(3)–I(2)    | 3.211(2)  | Br(1)–Pb(3)–I(2)     | 78.24(5)  |
| Pb(3)–I(3)    | 3.302(2)  | Br(1)#3–Pb(3)–I(2)#4 | 161.66(6) |
| Pb(3)–Br(1)#3 | 3.078(16) | Br(1)–Pb(3)–I(2)#4   | 85.87(4)  |
| Pb(3)–Br(1)   | 3.078(16) | Br(1)–Pb(3)–I(3)     | 118.09(5) |

Symmetry transformations used to generate equivalent atoms: #1 1-x, -y, 2-z; #2 1-x, 1-y, 2-z; #3 +x, 1+y, +z; #4 -x, -y, 1-z; #5 -x, 1-y, 1-z; #6 +x, -1+y, +z.

**Table S3. Pb-based chalcogenides.**

| <b>Compound</b>                                                                        | <b>Crystal system</b> | <b>Space group</b>           | <b>Pb-based units</b>                                                                                                                                             | <b>Structural dimensionality</b> | <b>Ref.</b>  |
|----------------------------------------------------------------------------------------|-----------------------|------------------------------|-------------------------------------------------------------------------------------------------------------------------------------------------------------------|----------------------------------|--------------|
| Pb <sub>7</sub> S <sub>2</sub> Br <sub>10</sub>                                        | Hexagonal             | <i>P6<sub>3</sub>/m</i>      | Pb(Br/S) <sub>3</sub> , PbBr <sub>5</sub> (Br/S) <sub>3</sub>                                                                                                     | 3D                               | 1            |
| Pb <sub>4</sub> SeBr <sub>6</sub>                                                      | Orthorhombic          | <i>Imm2</i>                  | PbSeBr <sub>6</sub> , PbSe <sub>2</sub> Br <sub>6</sub> , PbBr <sub>7</sub>                                                                                       | 3D                               | 2            |
| Pb <sub>5</sub> S <sub>2</sub> I <sub>6</sub>                                          | Monoclinic            | <i>C2/m</i>                  | PbI <sub>7</sub> , PbSI <sub>6</sub> , PbS <sub>3</sub> I <sub>3</sub>                                                                                            | 3D                               | 1            |
| Pb <sub>2</sub> BiS <sub>2</sub> I <sub>3</sub>                                        | Orthorhombic          | <i>Cmcm</i>                  | PbS <sub>3</sub> , PbS <sub>6</sub> I <sub>3</sub>                                                                                                                | 3D                               | 3            |
| Pb <sub>2</sub> SbS <sub>2</sub> I <sub>3</sub>                                        | Orthorhombic          | <i>Cmcm</i>                  | PbS <sub>3</sub> , PbS <sub>6</sub> I <sub>3</sub>                                                                                                                | 3D                               | 4            |
| Pb <sub>22</sub> Sb <sub>26</sub> S <sub>60</sub> Cl                                   | Triclinic             | <i>P<math>\bar{1}</math></i> | PbS <sub>5</sub> , PbS <sub>7</sub> , PbS <sub>6</sub> I, PbS <sub>8</sub>                                                                                        | 3D                               | 5            |
| Pb <sub>23</sub> Sb <sub>25</sub> S <sub>60</sub> Cl                                   | Triclinic             | <i>P<math>\bar{1}</math></i> | PbS <sub>5</sub> , PbS <sub>7</sub> , PbS <sub>8</sub> , PbS <sub>6</sub> Cl                                                                                      | 3D                               | 5            |
| Pb <sub>10</sub> Sb <sub>10</sub> S <sub>23</sub> Cl <sub>4</sub>                      | Triclinic             | <i>P2/m</i>                  | PbS <sub>7</sub> , PbS <sub>5</sub> Cl <sub>2</sub>                                                                                                               | 3D                               | 6            |
| Pb <sub>12.65</sub> Sb <sub>11.35</sub> S <sub>28.35</sub> Cl <sub>2.65</sub>          | Monoclinic            | <i>C2/m</i>                  | (Pb/Sb) <sub>3</sub> , (Pb/Sb) <sub>5</sub> , PbS <sub>5</sub> ,<br>PbS <sub>6</sub> , (Pb/Sb) <sub>7</sub> , PbS <sub>8</sub> , PbS <sub>6</sub> Cl <sub>2</sub> | 3D                               | 7            |
| Cu <sub>3.12</sub> Pb <sub>0.12</sub> Bi <sub>2.88</sub> S <sub>5</sub> I <sub>2</sub> | Orthorhombic          | <i>Cmcm</i>                  | (Bi/Pb) <sub>6</sub>                                                                                                                                              | 3D                               | 8            |
| Pb <sub>3.45</sub> Sb <sub>2.55</sub> S <sub>6.55</sub> Cl <sub>1.45</sub>             | Orthorhombic          | <i>Pnma</i>                  | PbS <sub>2</sub> (S/Cl) <sub>4</sub> Cl <sub>2</sub> , Pb(S/Cl) <sub>2</sub> ,<br>Pb(S/Cl) <sub>2</sub> Cl                                                        | 3D                               | 6            |
| Pb <sub>4.32</sub> Sb <sub>3.68</sub> S <sub>8.68</sub> Cl <sub>2.32</sub>             | Orthorhombic          | <i>Pnma</i>                  | (Pb/Sb) <sub>5</sub> , PbS <sub>6</sub> Cl <sub>2</sub> , PbS <sub>7</sub>                                                                                        | 3D                               | 9            |
| Hg <sub>2</sub> PbI <sub>2</sub> S <sub>2</sub>                                        | Tetragonal            | <i>P4/nnc</i>                | PbS <sub>4</sub> I <sub>3</sub>                                                                                                                                   | 3D                               | 10           |
| Pb <sub>2</sub> AsS <sub>3</sub> I                                                     | Tetragonal            | <i>Pnma</i>                  | PbS <sub>4</sub> I <sub>2</sub> , PbS <sub>4</sub> I <sub>3</sub>                                                                                                 | 3D                               | 11           |
| Pb <sub>4</sub> As <sub>2</sub> S <sub>6</sub> ICl                                     | Orthorhombic          | <i>Pmn2<sub>1</sub></i>      | PbS <sub>6</sub> I <sub>2</sub> , PbS <sub>6</sub> I <sub>3</sub>                                                                                                 | 3D                               | 12           |
| Ba <sub>4</sub> Ge <sub>2</sub> PbS <sub>8</sub> Br <sub>2</sub>                       | Orthorhombic          | <i>Pnma</i>                  | PbS <sub>5</sub> Br                                                                                                                                               | 3D                               | 13           |
| Ba <sub>4</sub> Ge <sub>2</sub> PbSe <sub>8</sub> Br <sub>2</sub>                      | Orthorhombic          | <i>Pnma</i>                  | PbSe <sub>5</sub> Br                                                                                                                                              | 3D                               | 13           |
| Pb <sub>3</sub> SBrI <sub>3</sub>                                                      | Monoclinic            | <i>P2<sub>1</sub>/m</i>      | PbS <sub>3</sub> , PbSI <sub>4</sub> , PbBr <sub>2</sub> I <sub>4</sub>                                                                                           | 2D                               | This<br>work |

**Table S4. Chalcogenides contain multiple halogens.**

| Compound                                                                           | Space group                                     | Functional units                                                                                                               | S/X ratio | Dimensionality | Ref.      |
|------------------------------------------------------------------------------------|-------------------------------------------------|--------------------------------------------------------------------------------------------------------------------------------|-----------|----------------|-----------|
| Hg <sub>5</sub> Ag <sub>4</sub> S <sub>5</sub> (I/Br) <sub>2</sub> Cl <sub>2</sub> | <i>P2<sub>1</sub>2<sub>1</sub>2<sub>1</sub></i> | AgS <sub>3</sub> (I/Br), AgS <sub>2</sub> Cl(Br/I) <sub>2</sub>                                                                | 5:4       | 3D             | 14        |
| Hg <sub>3</sub> S <sub>2</sub> Br <sub>1.5</sub> Cl <sub>0.5</sub>                 | <i>C2/m</i>                                     | HgS <sub>2</sub> Br, HgS <sub>2</sub> BrCl,<br>HgS <sub>2</sub> Br <sub>2</sub>                                                | 1:1       | 3D             | 15        |
| Hg <sub>3</sub> S <sub>2</sub> Br <sub>1.5</sub> Cl <sub>0.5</sub>                 | <i>Pm<math>\bar{3}</math>n</i>                  | HgS <sub>2</sub> Br/Cl, HgS <sub>2</sub> (Br/Cl) <sub>2</sub>                                                                  | 1:1       | 3D             | 15        |
| Hg <sub>3</sub> S <sub>2</sub> Br <sub>0.5</sub> Cl <sub>1.5</sub>                 | <i>C2/m</i>                                     | HgS <sub>2</sub> Cl, HgS <sub>2</sub> (Cl/Br) <sub>2</sub> Br,<br>HgS <sub>2</sub> (Cl/Br)Cl,<br>HgS <sub>2</sub> (Cl/Br)      | 1:1       | 3D             | 16        |
| Hg <sub>3</sub> S <sub>2</sub> Br <sub>0.5</sub> Cl <sub>1.5</sub>                 | <i>Pm<math>\bar{3}</math>n</i>                  | HgS <sub>2</sub> (Cl/Br) <sub>2</sub> Cl, HgS <sub>2</sub>                                                                     | 1:1       | 3D             | 16        |
| Hg <sub>6</sub> S <sub>4</sub> I <sub>2</sub> Br <sub>2</sub> Cl                   | <i>Pmna</i>                                     | HgS <sub>2</sub> Cl, HgS <sub>4</sub> , HgS <sub>2</sub> Br <sub>2</sub> I <sub>2</sub> ,<br>HgS <sub>2</sub> BrI <sub>2</sub> | 1:1       | 3D             | 17        |
| Pb <sub>4</sub> As <sub>2</sub> S <sub>6</sub> ICl                                 | <i>Pma2<sub>1</sub></i>                         | PbS <sub>3</sub> , PbS <sub>2</sub> Cl, PbAs <sub>2</sub> S <sub>6</sub> ICl                                                   | 3:1       | 3D             | 12        |
| Pb <sub>3</sub> SBrI <sub>3</sub>                                                  | <i>P2<sub>1</sub>/m</i>                         | PbS <sub>3</sub> , PbSI <sub>4</sub> , PbBr <sub>2</sub> I <sub>4</sub>                                                        | 1:4       | 2D             | This work |

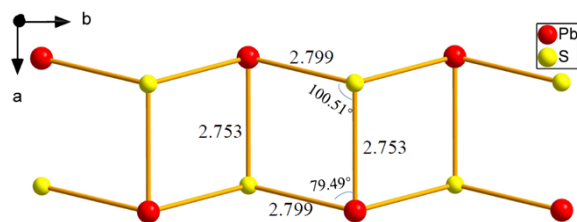

Figure S1. Unique stepped layers shape formed by adjacent parallelograms extending along the *b*-axis.

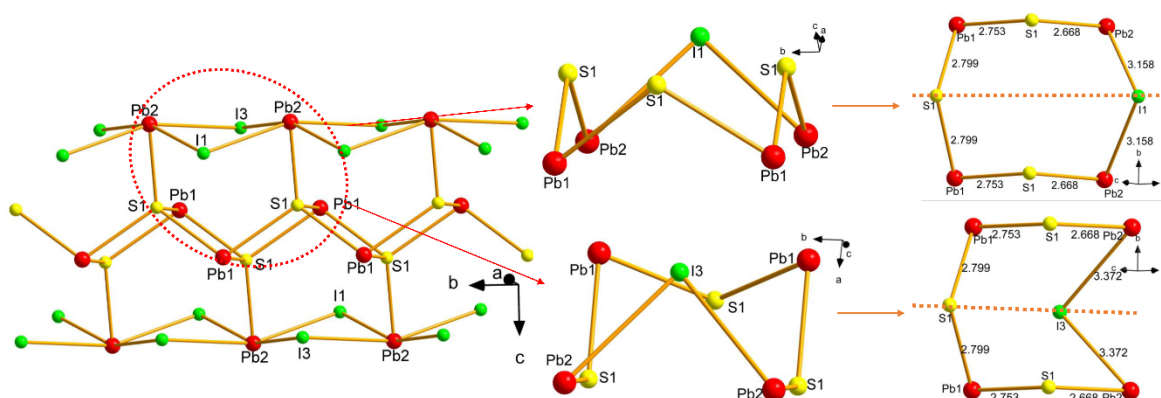

Figure S2. Two seesaw-like  $[Pb_4S_3I]^+$  units in the  $[Pb_3I_4S_2]_\infty$  neutral layer.

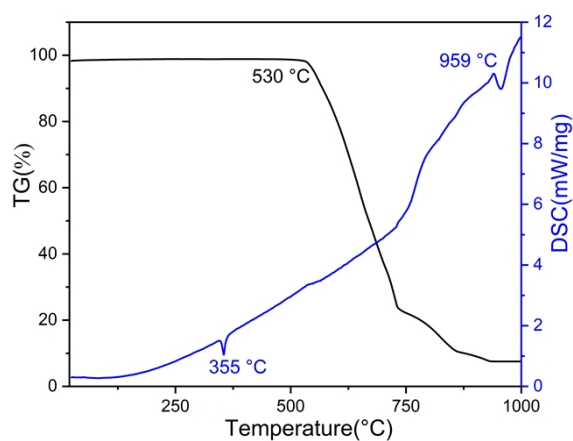

Figure S3. The TG-DSC curves of  $Pb_3SBrI_3$ .

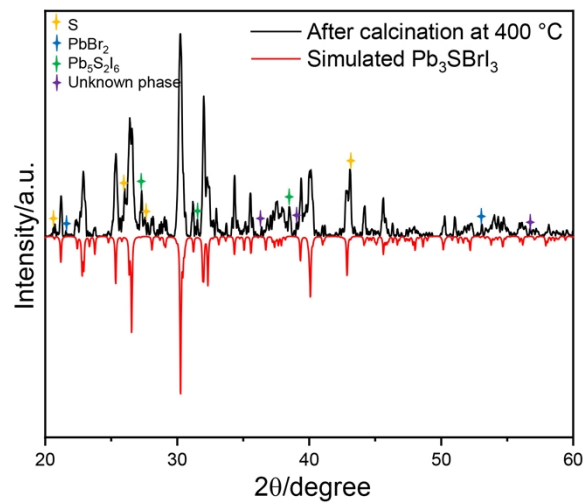

Figure S4. Simulated and experimental XRD pattern of powder calcinated at 400 °C.

## References

1. B. Krebs, *Z. Naturforsch. B*, 1970, **25**, 223–224.
2. J. K. Wang, H. P. Wu, H. W. Yu, Z. G. Hu, J. Y. Wang and Y. C. Wu, *Adv. Opt. Mater.*, 2022, **10**, 2102673–2102680.
3. S. M. Islam, C. D. Malliakas, D. Sarma, D. C. Maloney, C. C. Stoumpos, O. Y. Kontsevoi, A. J. Freeman and G. Kanatzidis, *Chem. Mater.*, 2016, **28**, 7332–7343.
4. C. Doussier, Y. Moëlo, P. Léone, A. Meerschaut and M. Evain, *Solid State Sci.*, 2007, **9**, 792–803.
5. E. Makovicky, D. Topa and W. G. Mumme, *Can. Mineral.*, 2006, **44**, 1499–1512.
6. D. Charlotte, M. Yves, M. Alain, L. Philippe and G. D. Catherine, *J. Solid. State. Chem.*, 2008, **181**, 920–934.
7. V. V. Kostov and J. Macicek, *Eur. J. Mineral.*, 1995, **4**, 1007–1018.
8. M. Ohmasa and K. Mariolacos, *Acta Crystallog. B*, 1974, **30**, 2640–2643.
9. V. V. Kostov, R. Petrova, J. Macicek, *Eur. J. Mineral.*, 1997, **9**, 1191–1198.
10. R. Blachnik, W. Buchmeier and H. A. Dreisbach, *Acta Cryst. C*, 1986, **42**, 515–517.
11. M. Zelenski, T. Balić-Žunić, L. Bindi, A. Garavelli, E. Makovicky, D. Pinto and F. Vurro, *Am. Mineral.*, 2006, **91**, 21–28.
12. L. Bindi, A. Garavelli, D. Pinto, G. Pratesi and F. Vurro, *J. Solid. State. Chem.*, 2008, **181**, 306–312.
13. Z. H. Lin, K. Feng, H. Tu, L. Kang, Z. S. Lin, J. Y. Yao and Y. C. Wu, *J. Alloy. Compd.*, 2014, **611**, 422–426.
14. K. Paul, L. Falk and S. Thomas, *Neues Jb. Miner. Abh.*, 2005, **181**, 1–9.
15. N. V. Pervukhina, S. A. Magarill, D. Y. Naumov, S. V. Borisov, V. I. Vasil'yev and B. G. Nenashev, *J. Struct. Chem.*, 2006, **47**, 312–317.
16. N. V. Pervukhina, S. A. Magarill, D. Y. Naumov, S. V. Borisov, V. I. Vasil'ev and B. G. Nenashev, *J. Struct. Chem.*, 2005, **46**, 641–646.
17. N. V. Pervukhina, V. I. Vasil'ev, S. V. Borisov, S. A. Magarill, and D. Y. Naumov, *Can. Mineral.*, 2003, **41**, 1445–1453.
